# Supplementary material for: Comprehensive characterization of tissue-specific circular RNAs in the human and mouse genomes
Source: Oxford University Press journal article supplement (doi:10.1093/bib/bbw081), 2016-08-20
Supplement: table_s1_r1_bbw081.docx [file table_s1_r1_bbw081.docx]

**Table S1. Primers designed for RT-PCR validation of TS circRNAs**

| Target circRNA | Primer sequence (5'-3') | Target size (bp) | TM(℃） |
| --- | --- | --- | --- |
| Brain_RIMS1 | TGGAGTATTGCTCGTGGTC | 201 | 58 |
|  | GTGGAAAGAAGCGGAGGT |
| Heart_PDE4DIP | CTCCTCTAAGTGCTGGTGG | 151 | 58 |
|  | GCCTTTGCCTTGAGAACG |
| Liver_ADK | ATTCTCTGAAACCAAATGAC | 126 | 56 |
|  | TATCAAGGAAATCTTTGTCTA |
| Lung_LAMP3 | ATCTGTTCTGCTGATGTTGC | 263 | 58 |
|  | ACAGAGAAGACTTACCAGGGA |
| Thymus-SATB1 | TCTCTCAGTGGCAAGGGT | 99 | 56 |
|  | CAGCAGGAAATGAAGCGT |
| GAPDH | CGTGCCGCCTGGAGAAACCTG | 140 | 60 |
|  | AGAGTGGGAGTTGCTGTTGAAGTCG |
